# Supplementary material for: Evaluation of Metal(loids) Concentrations in Soils of Selected Rice Paddy Fields in Malawi
Source: MDPI journal article supplement (doi:10.3390/agronomy12102349), 2022-09-29
Supplement: s1 [file s1]

## Evaluation of Metal(loids) Concentrations in Soils of Selected Rice Paddy Fields in Malawi

Angstone Thembachako Mlangeni <sup>1,\*</sup>, Andrea Raab <sup>2</sup>, Patsani Kumambala <sup>1</sup>,  
Maurice Monjerezi <sup>3</sup>,  
Limbikani Matumba <sup>1</sup> and Joerg Feldmann <sup>2,4</sup>

<sup>1</sup> Faculty of Life Sciences and Natural Resources, Natural Resources College,  
Lilongwe University of Agriculture and Natural Resources, P.O. Box 143, Lilongwe,  
Malawi

<sup>2</sup> TESLA-Analytical Chemistry, Institute of Chemistry, University of Graz,  
Universitätsplatz 1, 8010 Graz, Austria

<sup>3</sup> Chemistry Department, Faculty of Sciences, University of Malawi, P.O Box 280,  
Zomba, Malawi

<sup>4</sup> TESLA-Analytical Chemistry, Chemistry Department, School of Natural and  
Computing Sciences, University of Aberdeen, Aberdeen, AB24 3UE, UK

\* Correspondence: [amlangeni@luanar.ac.mw](mailto:amlangeni@luanar.ac.mw) (ATM); Tel.: +265-(0)88-951-1822

## Tables

**Table S1.** ICP-MS (ICP-MS/MS) optimal conditions

| Parameter                  | Value                     |
|----------------------------|---------------------------|
| RF power                   | 1550 W                    |
| RF matching                | 1.72 V                    |
| Nebulizer gas flow rate    | 1.1 L/min                 |
| Sample depth               | 9.0 mm                    |
| Nebulizer pump             | 0.10 rps                  |
| Auxiliary gas              | 0.8 L/min                 |
| Plasma gas (argon)         | 15.0 L/min                |
| He gas flow rate           | 4.0 - 4.2 L/min           |
| H2 gas flow rate           | 4.0 - 4.2 L/min           |
| Sample introduction        | double pass spray chamber |
| Sample introduction method | micro-mist                |
| Sample flow rate           | 0.8 - 1 mL/min            |
| Integration time           | 0.3 - 10 s                |

**Table S2.** List of metal(oids) analysed in this study showing Mass charge (m/z) ratio and gas modes.

| Element | m/z ratio | Gas mode |
|---------|-----------|----------|
| As      | 75        | H2       |
| Cd      | 111       | He       |
| Co      | 59        | He       |
| Cr      | 52        | He       |
| Mn      | 55        | He       |
| Pb      | 208       | He       |
| Ga      | 71        | He       |
| U       | 238       | He       |

**Table S3.** Descriptive statistics of metal(oids) concentrations (mg kg<sup>-1</sup>) in soils of various rice fields (n=66). All analyses were performed in triplicates.

| Site name    | Site #         | Abbr.      | pH   | AS       | Cr     | Co   | Mn       | Pb   | Cd              | U       | Ga    |
|--------------|----------------|------------|------|----------|--------|------|----------|------|-----------------|---------|-------|
| Lifuwu       | 11             | LFW (n=4)  | 8.3  | 3.3±0.6  | 87±10  | 17±1 | 403±79   | 16±2 | 0.033±0.01      | 2.3±0.3 | 39±±4 |
| North Rumphu | 4              | NRU (n=4)  | 6.58 | 2.8±1.0  | 38±33  | 9±6  | 225±178  | 12±4 | 0.021±0.01      | 2.3±0.7 | 17±2  |
| Domasi       | 17             | DOM (n=3)  | 5.61 | 2.8±0.2  | 17± 4  | 6±1  | 320±12   | 13±1 | 0.034±0.02      | 2.3±0.2 | 19±3  |
| Salima       | 10, 12, 13 14, | SA (n=4)   | 6.86 | 2.5±0.5  | 128±26 | 28±1 | 729±14   | 12±1 | 0.067±0.06      | 1.9±0.1 | 33±6  |
| Balaka       | 17, 18         | BLK (n=6)  | 5.91 | 2.4±0.4  | 127±45 | 27±6 | 1097±473 | 7± 1 | 0.093±0.04      | 1.5±0.1 | 26±4  |
| Hara         | 3              | HAR (n=6)  | 6.20 | 2.4±1.2  | 59±22  | 14±4 | 501±179  | 12±4 | 0.028±0.03      | 2.6±0.9 | 29±5  |
| Bwanje       | 15, 16a, 16b   | BWJ (n=4)  | 6.13 | 2.3±0.4  | 59±7   | 15±1 | 429±60   | 7± 1 | 0.022±0.10      | 1.6±0.1 | 24±2  |
| Nkhate       | 21, 22         | NKT (n=3)  | 6.82 | 2.1±0.3  | 136±30 | 29±6 | 776±284  | 11±2 | 0.086±0.02      | 1.7±0.1 | 26±2  |
| Kasinthula   | 20             | KAS (n=4)  | 6.82 | 2.0±0.2  | 54±9   | 16±2 | 511±124  | 6± 3 | 0.043±0.01      | 2.0±0.3 | 17±2  |
| Lifiliya     | 1,2            | LFY (n=5)  | 6.56 | 2.0±0.2  | 135±40 | 25±2 | 855±67   | 15±3 | 0.043±0.03      | 2.8±0.2 | 29±4  |
| Nkhotakota   | 7, 8, 9        | KK (n=8)   | 6.15 | 1.8±0.3  | 108±47 | 26±4 | 611±125  | 12±3 | 0.057±0.02      | 1.9±0.1 | 30±7  |
| Khanda       | 19, 19b        | KHA (n=6)  | 6.31 | 1.7±0.9  | 44± 25 | 16±8 | 426±445  | 7±3  | 0.025±0.02      | 1.5±0.2 | 20±5  |
| Limphasa     | 5, 6           | LPH (n=10) | 4.91 | 1.2±0.4  | 30±11  | 11±3 | 651±264  | 16±5 | 0.011±0.01      | 2.8±0.5 | 21±1  |
| Nazolo       | 21             | NAZ (n=4)  | 6.62 | 1.2±0.2  | 71±38  | 22±4 | 883±193  | 5±1  | 0.050±0.01      | 1.3±0.1 | 15±3  |
| Summary      |                |            |      |          |        |      |          |      |                 |         |       |
| Mean         |                |            |      | 1.9±0.60 | 81±42  | 14±7 | 601±245  | 10±4 | 0.044±0.02<br>4 | 1.3±0.5 | 24±6  |
| Median       |                |            |      | 2.2      | 65     | 16   | 561      | 12   | 0.038           | 1.9     | 25    |
| Min          |                |            |      | 1.2      | 17     | 6    | 225      | 5    | 0.011           | 1.3     | 15    |
| Max          |                |            |      | 3.3      | 136    | 29   | 1097     | 16   | 0.093           | 2.8     | 35    |

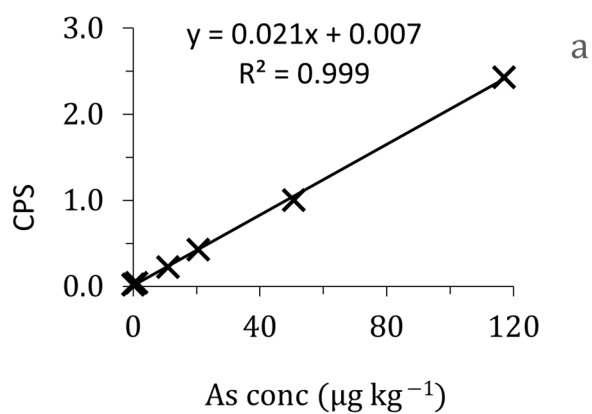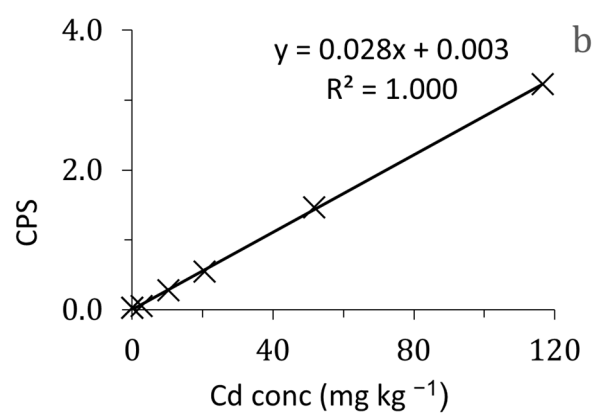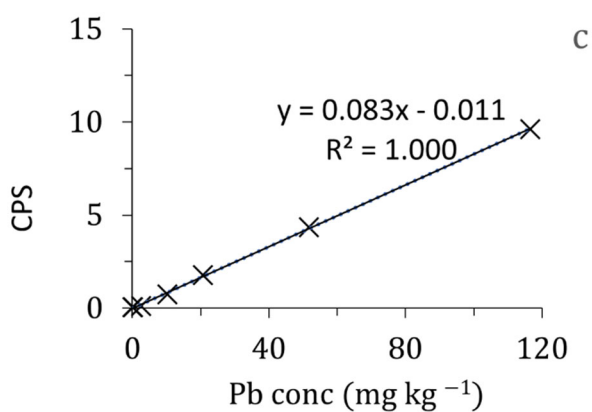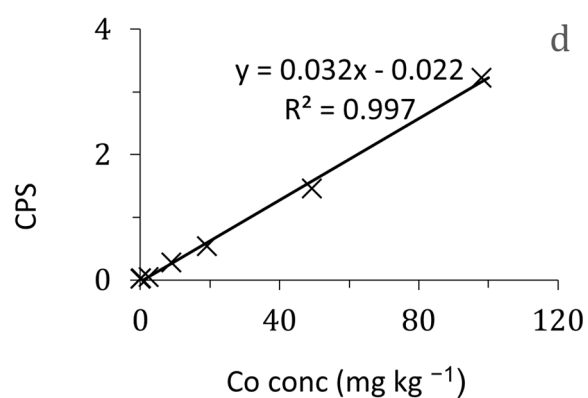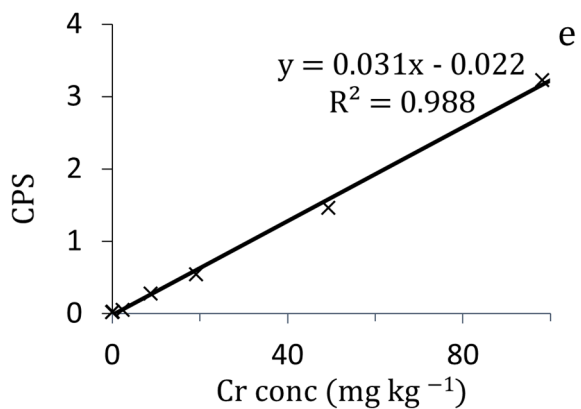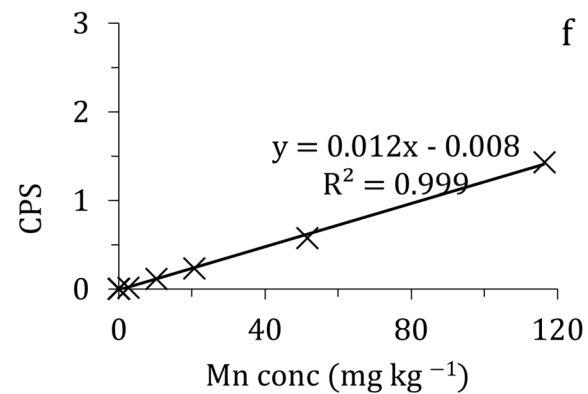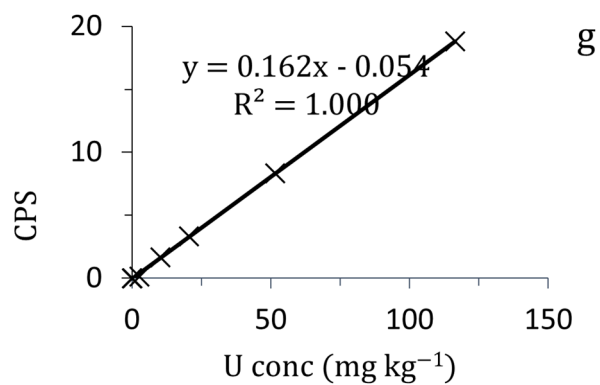

Figure S1. External calibration using accu-Trace multi-element indicating calibration curve for As (a), Cd (b), Pb (c), Co (d), Cr (e), Mn (f) and U (g). CPS, counts per second. External calibration was carried out using standards prepared from an accu-Trace multi-element standard solution diluted with 5% nitric acid (obtained from Mallinckrodt Chemicals, USA) [1,2]. For each analytical run (batch), mass charge ratios of As ( $m/z = 75$ ), Cd ( $m/z = 110$ ), Co ( $m/z = 59$ ), Cr ( $m/z = 52$ ), Mn ( $m/z = 51$ ), Pb ( $m/z = 208$ ), U ( $m/z = 205$ ), and Ga ( $m/z = 73$ ) were selected for analyses and a six-point external calibration curve of 0, 1.0, 5.0, 25, 50, and 100  $\mu\text{g kg}^{-1}$  was used [3,4].

1. Sun, G.X.; Williams, P.N.; Carey, A.M.; Zhu, Y.G.; Deacon, C.; Raab, A.; Feldmann, J.; Islam, R.M.; Meharg, A.A. Inorganic Arsenic in Rice Bran and Its Products Are an Order of Magnitude Higher than in Bulk Grain. *Environ. Sci. Technol.* **2008**, *42*, 7542–7546, doi:10.1021/es801238p.
2. Bückner, P.; Raab, A.; P, H. Analytica Chimica Acta Validation and Inter-Laboratory Study of Selective Hydride Generation for Fast Screening of Inorganic Arsenic in Seafood Tursd O. **2018**, doi:10.1016/j.aca.2018.11.036.
3. Mlangeni, A.T.; Lancaster, S.T.; Raab, A.; Krupp, E.M.; Norton, G.J.; Feldmann, J. Impact of Soil-Type , Soil-PH , and Soil-Metal ( Loids ) on Grain-As and Cd Accumulation in Malawian Rice Grown in Three Regions of Malawi. *Environ. Adv.* **2022**, *7*, 100145, doi:10.1016/j.envadv.2021.100145.
4. Mlangeni, A.T.; Perez, M.; Raab, A.; Krupp, E.M.; Norton, G.J.; Feldmann, J. Simultaneous Stimulation of Arsenic Methylation and Inhibition of Cadmium Bioaccumulation in Rice Grain Using Zero Valent Iron and Alternate Wetting and Drying Water Management. *Sci. Total Environ.* **2020**, *711*, 134696, doi:10.1016/j.scitotenv.2019.134696.
